# Supplementary material
Source: Springer Nature journal article supplement (https://www.springermedizin.de/resource/supplementary/12958_2005_288_MOESM6_ESM.pdf/9567664)

## PGMRC1

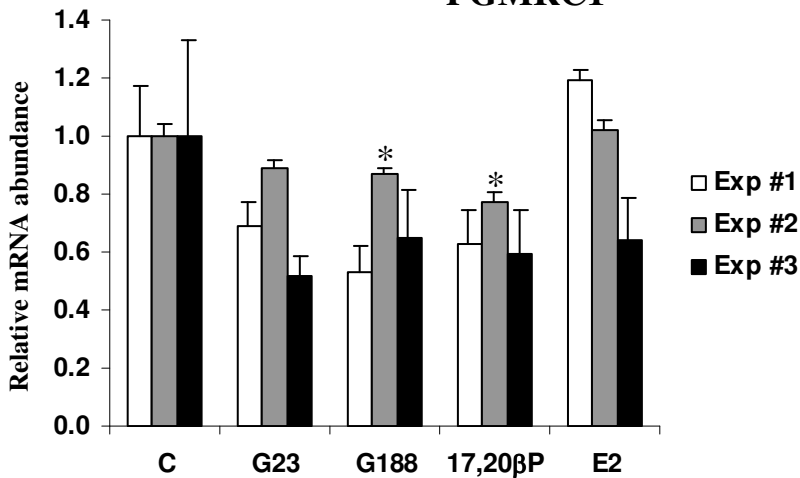

## mPRβ

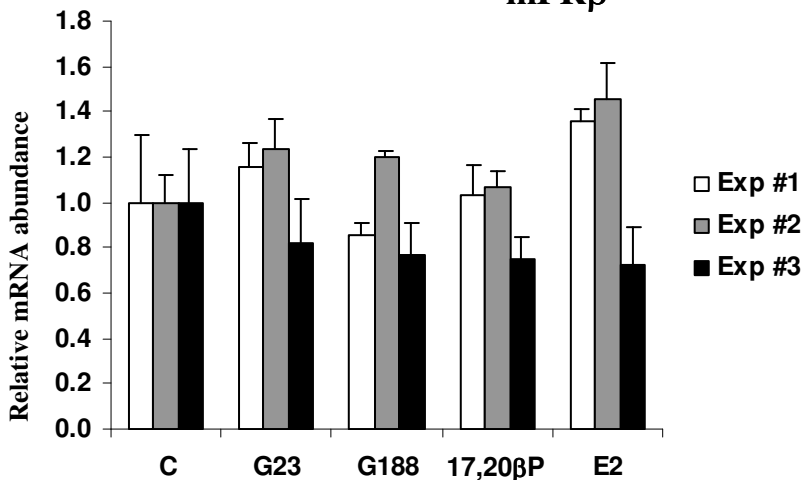

GVBD

0%

0%

100%

100%

0%

Supplement: MOESM6 [file 9567664]
